# Supplementary material for: Wundbehandlung mit Kaltplasma
Source: Springer Nature journal article supplement (doi:10.1007/s41906-023-2061-2), 2023-04-17
Supplement: MOESM1 [file 25252222]

## Literatur

### zum Beitrag „Wundbehandlung mit Kaltplasma“

von Ursula Elisabeth Maria Werra, Bernhard Dorweiler

*PflegeZeitschrift* (76) 5/2023, S. 26-29

Alkawareek MY, Gorman SP, Graham WG, Gilmore BF (2014) Potential cellular targets and antibacterial efficacy of atmospheric pressure non-thermal plasma. *Int J Antimicrob Agents* 43(2):154–160

Amini MR, Sheikh Hosseini M, Fatollah S, Mirpour S, Ghoranneviss M, Larijani B, Mohajeri-Tehrani MR, Khorramizadeh MR (2020) Beneficial effects of cold atmospheric plasma on inflammatory phase of diabetic foot ulcers; a randomized clinical trial. *JDiabetesMetabDisord*19(2):895–905

Assadian O, Ousey KJ (2019) Effects and safety of atmospheric low-temperature plasma on bacterial reduction in chronic wounds and wound size reduction: A systematic review and meta-analysis. *IntWound*16:103–111

Brehmer F, Haenssle HA (2015) Alleviation of chronic venous leg ulcers with a hand-held dielectric barrier discharge plasma generator (PlasmaDerm<sup>®</sup>) VU-2010): results of a monocentric, two-armed, open, prospective, randomized and controlled trial (NCT01415622). *J Eur Acad Dermatol Venereol* 29(1):148–155

Gan L, Jiang J (2021) Cold atmospheric plasma applications in dermatology: a systematic review. *J Biophotonics*. <https://doi.org/10.1002/jbio.202000415>

Goepel L, Heyer K (2015) Selektivverträge zu chronischen Wunden – aktueller Stand in Deutschland. *Gefäßchirurgie* 20:18–24

Haertel B, von Woedtke T, Weltmann KD, Lindequist U (2014) Non-thermal atmospheric-pressure plasma possible application in wound healing. *Biomol Ther* 22(6):477–490

Hiller J, Stratmann B, Timm J, Costea TC, Tschöpe D (2022) Enhanced growth factor expression in chronic diabetic wounds treated by cold atmospheric plasma. *Diabet Med*. <https://doi.org/10.1111/dme.14787>

Hoffmann C, Berganza C, Zhang J (2013) Cold atmospheric plasma: methods of production and application in dentistry and oncology. *MedGasRes* 3(1):21–21

[https://www.der-niedergelassene-arzt.de/fileadmin/user\\_upload/zeitschriften/haut/Artikel-pdfs/2015/2015\\_5/HAUT\\_5-15\\_Ubersicht\\_Hager.pdf](https://www.der-niedergelassene-arzt.de/fileadmin/user_upload/zeitschriften/haut/Artikel-pdfs/2015/2015_5/HAUT_5-15_Ubersicht_Hager.pdf). Zugegriffen: 21. Juli 2022

[https://www.g-ba.de/downloads/39-261-5014/2021-09-23\\_Bekanntmachung-Ermittlung-SN\\_Kaltplasma\\_BAnz.pdf](https://www.g-ba.de/downloads/39-261-5014/2021-09-23_Bekanntmachung-Ermittlung-SN_Kaltplasma_BAnz.pdf). Zugegriffen: 15. Aug. 2022

<https://www.schreiner-group.com/de/unternehmen/presse/pressemitteilungen/wundheilungmit-plasma/>. Zugegriffen: 21. Juli 2022

Isbary G, Heinlin J (2012) Successful and safe use of 2min cold atmospheric argon plasma in chronic wounds: results of a randomized controlled trial. *Br J Dermatol* 167:404–410

- Isbary G, Morfill G, Schmidt HU, Georgi M, Ramrath K, Heinlin J, Karrer S, Landthaler M, Shimizu T, Steffes B, Bunk W, Monetti R, Zimmermann JL, Pompl R, Stolz W (2010) A first prospective and randomized controlled trial to decrease bacterial load using cold atmospheric argon plasma on chronic wounds inpatients. *Br J Dermatol* 163(1):78–82
- Kühnl A, Knipfer E, Lang T (2020) Krankenhausinzidenz, stationäre Versorgung und Outcome der peripheren arteriellen Verschlusskrankheit und arteriellen Thrombose/Embolie in Deutschland von 2005 bis 2018. *Gefäßchirurgie* 25:433–445
- Leduc M, Guay D, Leask RL, Coulombe S (2009) Cell permeabilization using a non-thermal plasma. *New J Phys* 11:115021
- Leitlinie DGMKG. Rationaler therapeutischer Einsatz von kaltem physikalischem Plasma. AWMF Register-Nr.:007–107.2022
- Lynn PB, Graham WG, Gilmore BF (2019) *Acinetobacter baumannii* biofilm biomass mediates tolerance to cold plasma. *Lett Appl Microbiol* 68(4):344–349
- Menter A, Korman NJ, Elmetts CA, Feldman SR, Gelfand JM, Gordon KB, Gottlieb A, Koo JYM, Lebwohl IM, Lim HW, Van Voorhees AS, Beutner KR, Bhushan A (2010) Guidelines of care for the management of psoriasis and psoriatic arthritis: Section 5. Guidelines of care for the treatment of psoriasis with phototherapy and photochemotherapy. *J Am Acad Dermatol* 62(1):114–135
- Mirpour S, Fathollah S, Mansouri P (2020) Cold atmospheric plasma as an effective method to treat diabetic foot ulcers: a randomized clinical trial. *SciRep* 10:10440
- Moelleken M, Jockenhöfer F (2020) Pilotstudie zum Einfluss von kaltem atmosphärischem Plasma auf bakterielle Kontamination und Heilungstendenz chronischer Wunden. *J Dtsch Dermatol Ges* 18(10):1094–1102
- Oliveira MAC, Gd LM, Nishime TMC, Gontijo AVL, Menezes BRC, Caliarimv, Kostov KG, Koga-Ito CY (2021) Inhibitory Effect of Cold Atmospheric Plasma on Chronic Wound-Related Multispecies Biofilms. *Appl Sci* 11:5441
- Raeder K, Strube-Lahmann S, Müller-Werdan U, Kottner J, Lahmann NA, Suhr R (2019) Prävalenz und Einflussfaktoren von chronischen Wunden bei Klienten von ambulanten Pflegediensten in Deutschland. *Z Evid Fortbild Qual Gesundheitswes* 140:14–21
- Reuter S, von Woedtke T, Weltmann KD (2018) The kINPen—a review on physics and chemistry of the atmospheric pressure plasma jet and its applications. *J Phys D Appl Phys*. <https://doi.org/10.1088/1361-6463/aab3ad>
- Samsavar S, Mahmoudi H, Shakouri R, Khani MR, Molavi B, Moosavi J, Daneshpazhooh M, Etesami I, Shokri B (2021) The evaluation of efficacy of atmospheric pressure plasma in diabetic ulcers healing: A randomized clinical trial. *Dermatology*. <https://doi.org/10.1111/dth.15169>
- Stratmann B, Costea TC, Nolte C, Hiller J, Schmidt J, Reindel J, Masur K, Motz W, Timm J, Kerner W, Tschoepe D (2020) Effect of cold atmospheric plasma therapy vs standard therapy placebo on wound healing in patients with diabetic foot ulcers: a randomized clinical trial. *JAMA Netw Open*. <https://doi.org/10.1001/jamanetworkopen.2020.10411>
- Strohal R, Dietrich S, Mittlböck M et al (2022) Chronic wounds treated with cold atmospheric plasmajet versus best practice wound dressings: a multicenter, randomized, non-inferiority trial. *Sci Rep* 12:3645

von Woedtke Th, Reuter S, Masur K, Weltmann KD (2013) Plasmas for medicine. Phys Rep 530(4):291–232

Werdin F, Tennenhaus M, Schaller HE, Rennekampff HO (2009) Evidence-based management strategies for treatment of chronic wounds. ePlasty 9:e19

Werra UEM, ZinserM, Dorweiler B (2022) Physikalische Interventionen als Alternative/Ergänzung zum chirurgischen Wunddebridement. Gefäßchirurgie 27:129–134
